# Supplementary material for: Functionalized hexagonal boron nitride bilayers: desirable electro-optical properties for optoelectronic applications
Source: Royal Society of Chemistry journal article supplement (doi:10.1039/d4cp01846j), 2024-01-01
Supplement: d4cp01846j1.pdf [file d4cp01846j1.pdf]

Supporting information for

**Functionalized hexagonal boron nitride bilayers: Desirable electro-optical properties for optoelectronic applications**

Huabing Shu\*

*School of Science, Jiangsu University of Science and Technology, Zhenjiang 212001, China*

\*E-mail: [shuhuabing@just.edu.cn](mailto:shuhuabing@just.edu.cn)

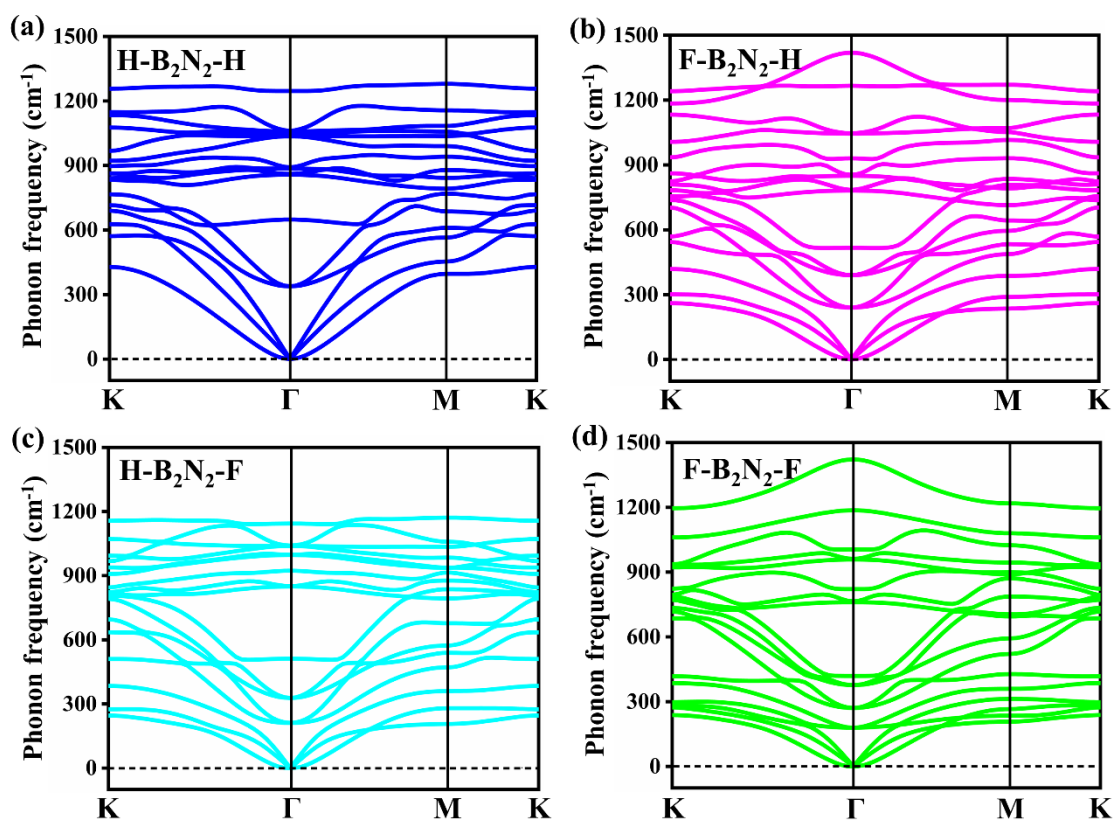

**Fig. S1** (a)-(d) Phonon spectra of functionalized h-BN bilayers, in which the phonon vibration modes with lower frequencies are provided for the H-B<sub>2</sub>N<sub>2</sub>-H, F-B<sub>2</sub>N<sub>2</sub>-H, H-B<sub>2</sub>N<sub>2</sub>-F, and F-B<sub>2</sub>N<sub>2</sub>-F.

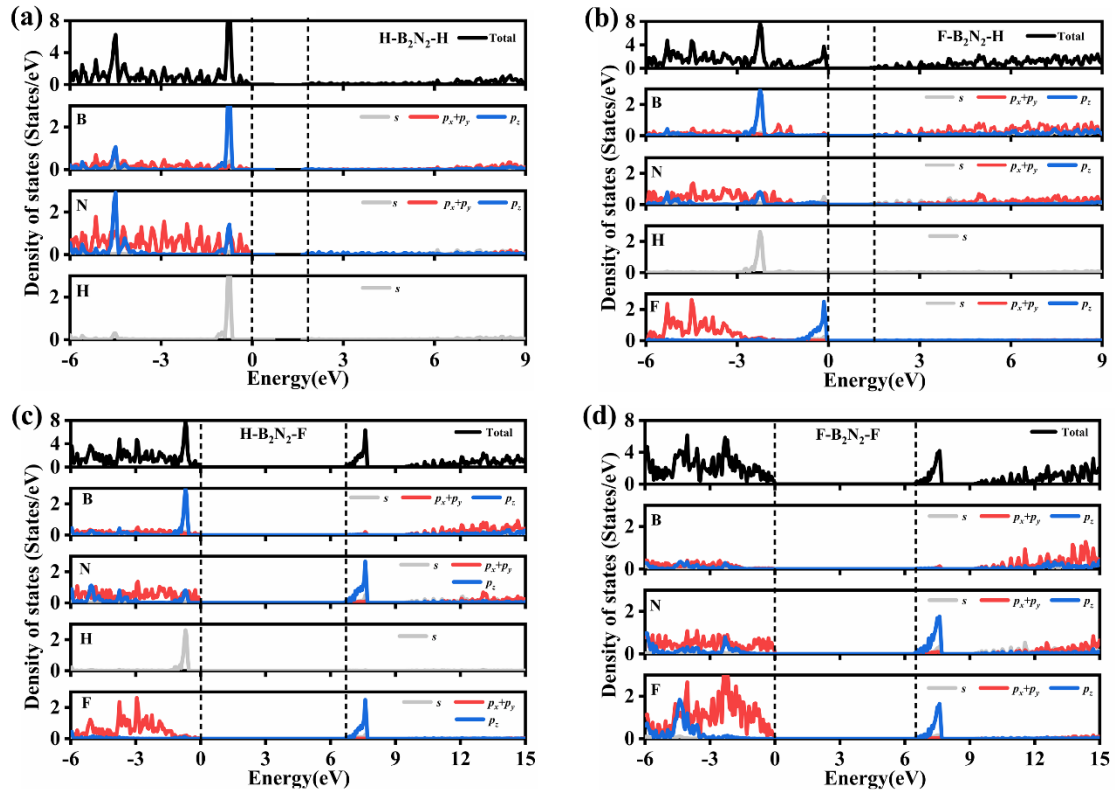

**Fig. S2** The total and projected density of states of the observed systems: (a) H-B<sub>2</sub>N<sub>2</sub>-H, (b) F-B<sub>2</sub>N<sub>2</sub>-H, (c) H-B<sub>2</sub>N<sub>2</sub>-F, and (d) F-B<sub>2</sub>N<sub>2</sub>-F.
